# Supplementary material for: Suicide theory-guided natural language processing of clinical progress notes to improve prediction of veteran suicide risk: protocol for a mixed-method study
Source: PubMed Central journal article supplement — BMJ Open. 2022 Aug 24;12(8):e065088. doi: 10.1136/bmjopen-2022-065088 (PMC9413184; doi:10.1136/bmjopen-2022-065088), 2022-08-24
Supplement: bmjopen-2022-065088.reviewer_comments.pdf [file bmjopen-2022-065088.reviewer_comments.pdf]

## PEER REVIEW HISTORY

BMJ Open publishes all reviews undertaken for accepted manuscripts. Reviewers are asked to complete a checklist review form (<http://bmjopen.bmj.com/site/about/resources/checklist.pdf>) and are provided with free text boxes to elaborate on their assessment. These free text comments are reproduced below.

## ARTICLE DETAILS

|                            |                                                                                                                                                                |
|----------------------------|----------------------------------------------------------------------------------------------------------------------------------------------------------------|
| <b>TITLE (PROVISIONAL)</b> | Suicide theory-guided natural language processing of clinical progress notes to improve prediction of veteran suicide risk: protocol for a mixed-methods study |
| <b>AUTHORS</b>             | Meerwijk, Esther; Tamang, Suzanne R.; Finlay, Andrea K.; Ilgen, Mark A.; Reeves, Ruth M.; Harris, Alex H. S.                                                   |

This article was not externally reviewed at BMJ Open. Protocols that have been independently assessed prior to submission to BMJ Open are usually fast-tracked to publication on the grounds that further substantial changes will not be possible. This independent assessment will usually be external, independent review for both a substantial grant award from a non-commercial or government funder and ethics approval.
